# Supplementary material
Source: MDPI journal article supplement (https://www.mdpi.com/2076-3417/12/3/954)

**Figure S1.** Extended phylogenetic trees of four stains of *Lactobacillus plantarum*.  
S1A

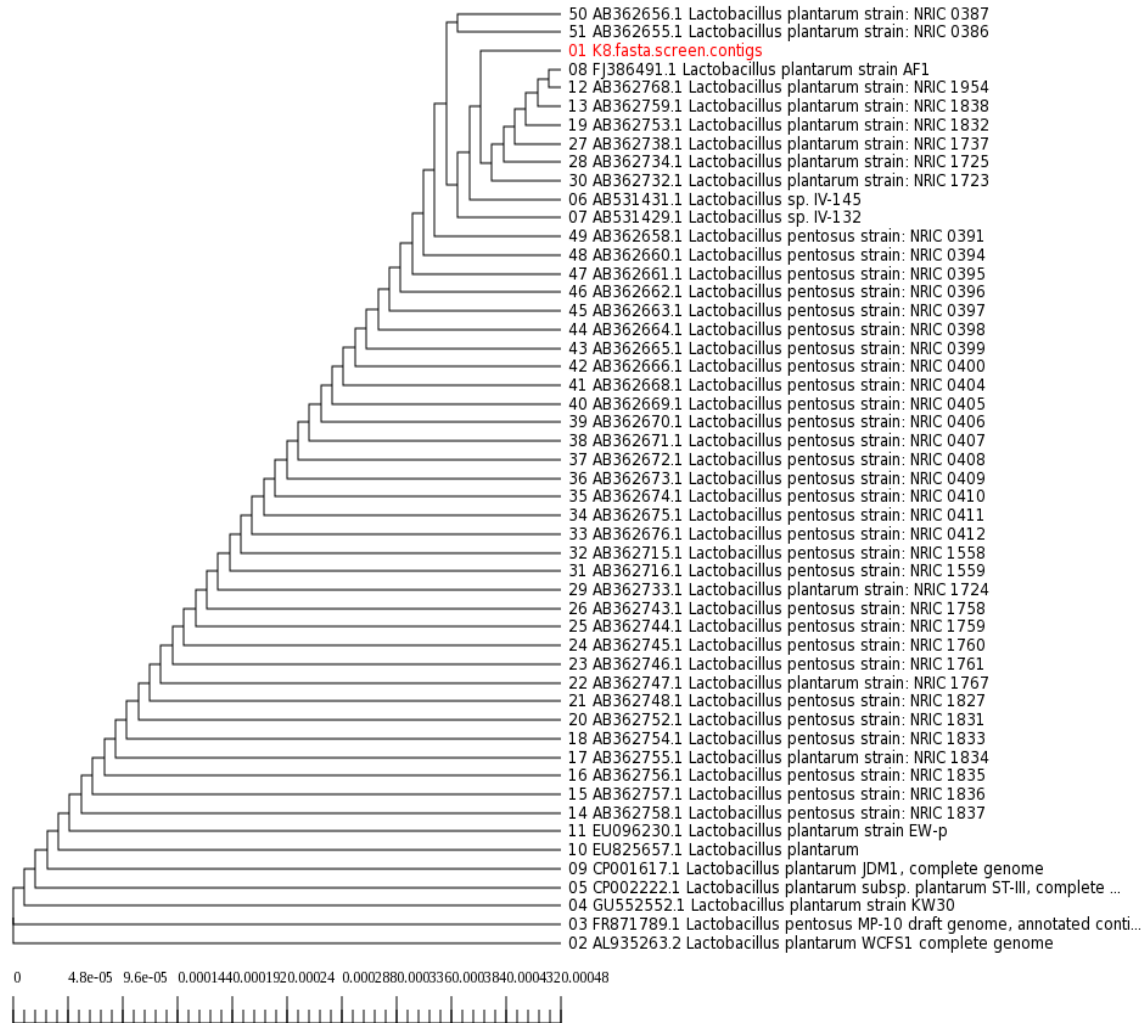

S1B

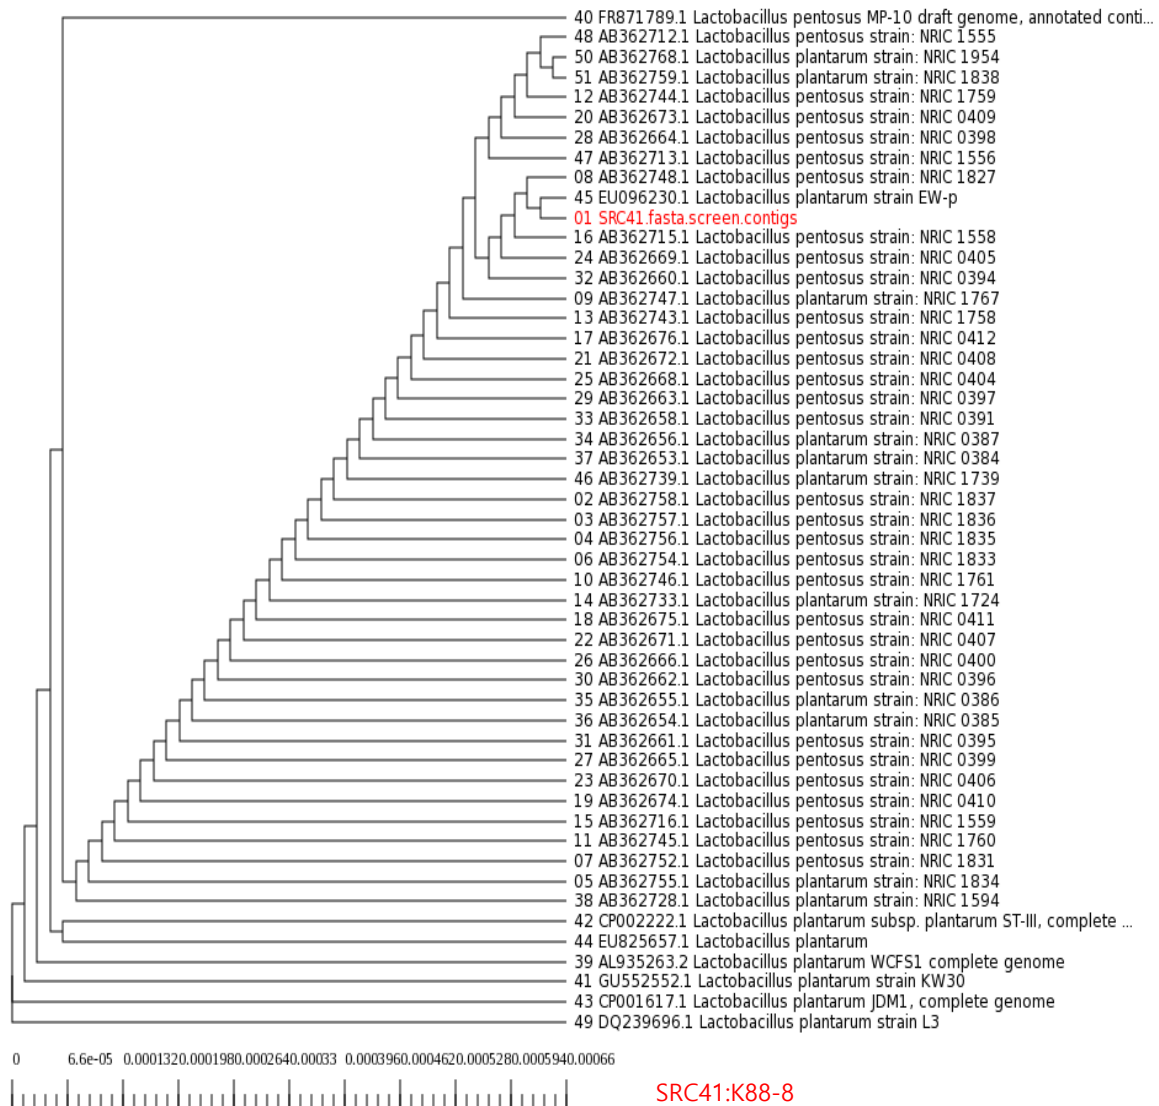

S1C

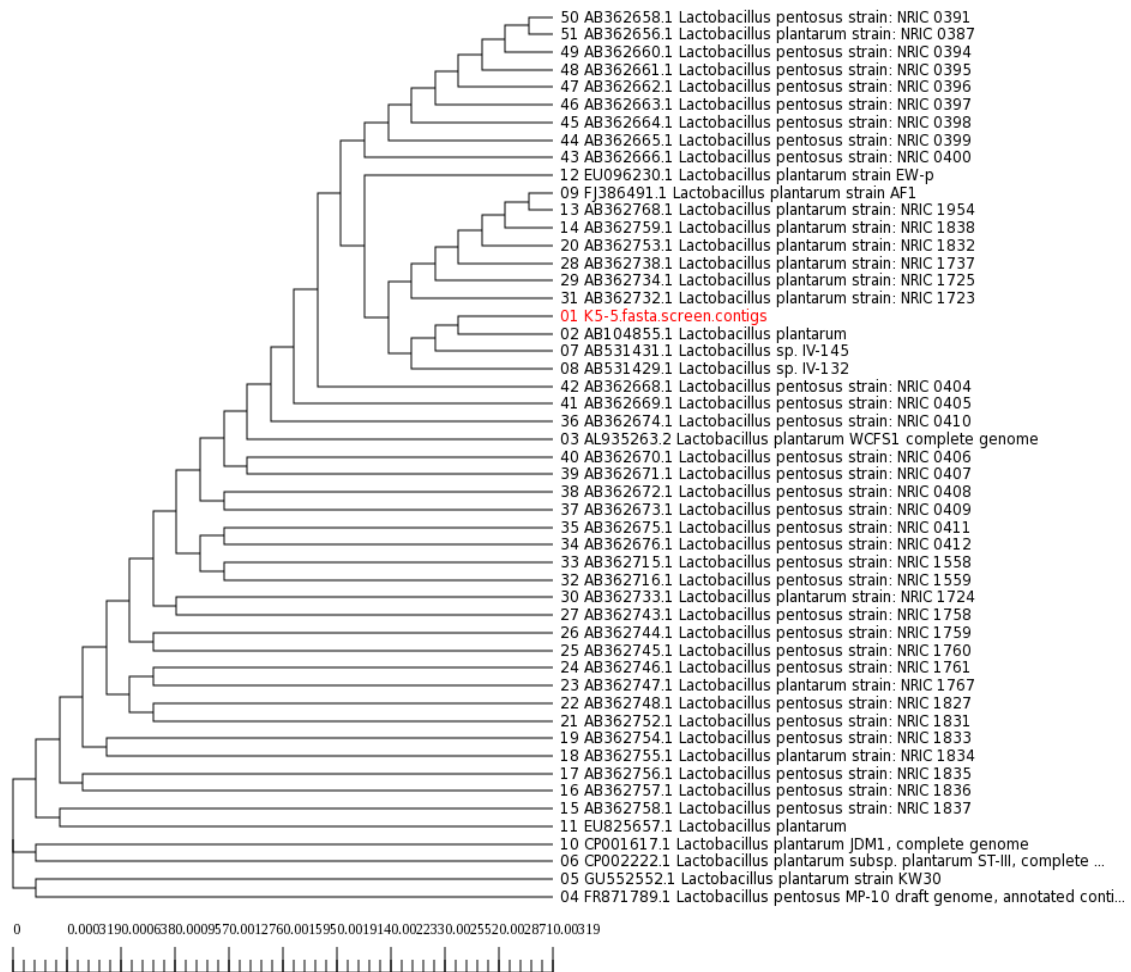

S1D

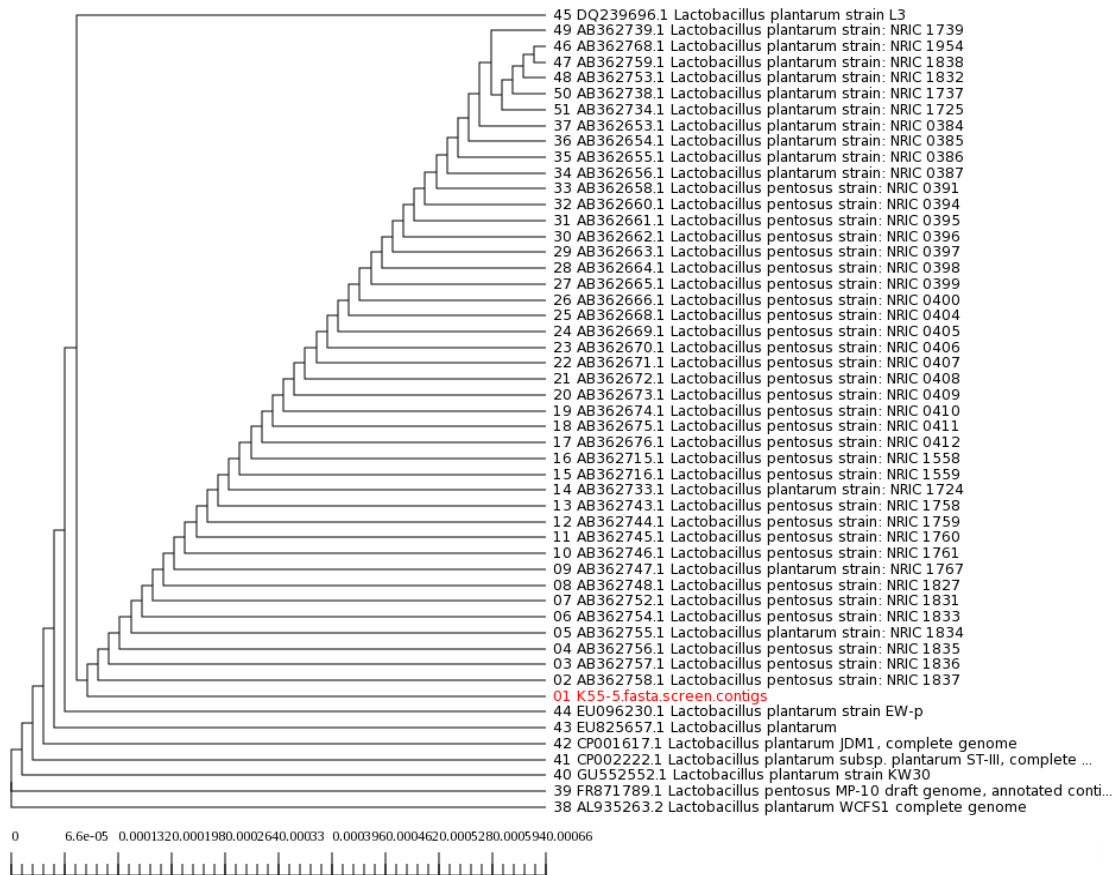

**Figure S2.** SPR analysis using LTAs and TLR2, TLR4, and CD14.  
S2A

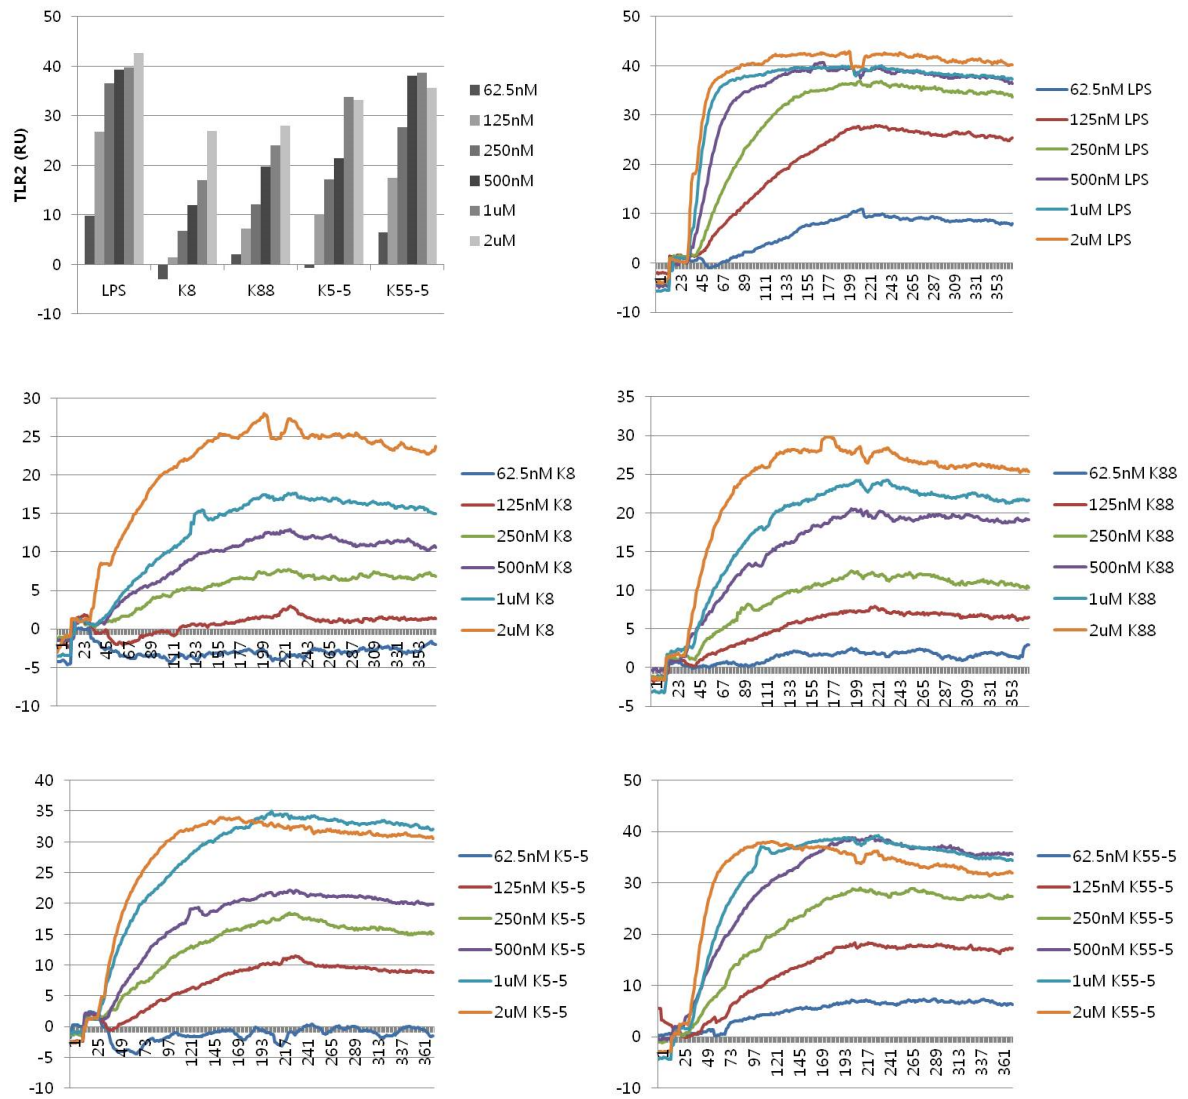

S2B

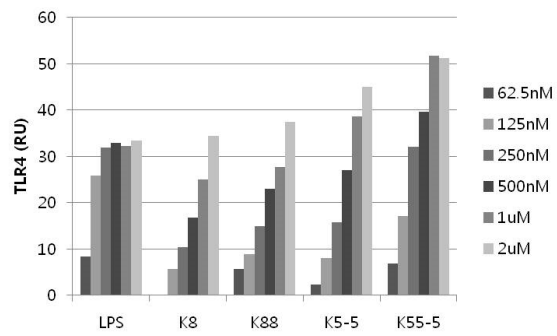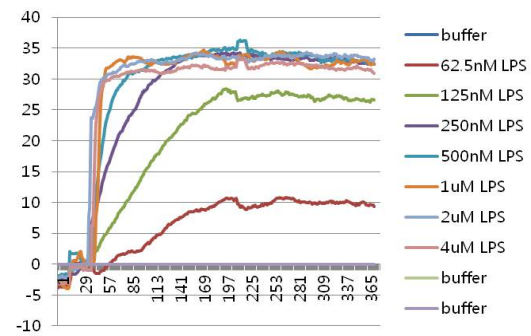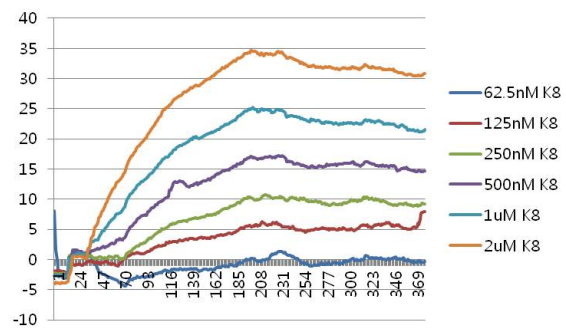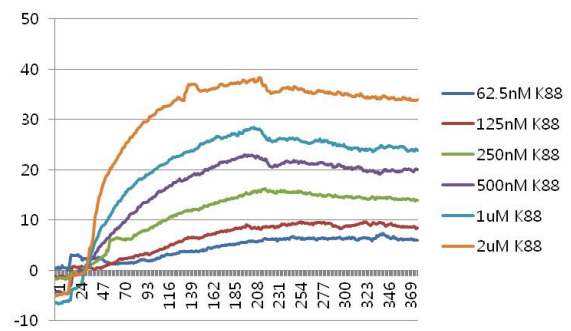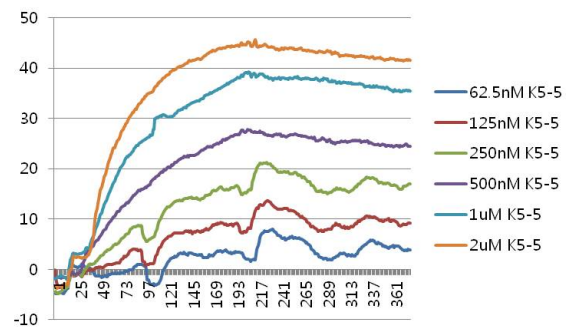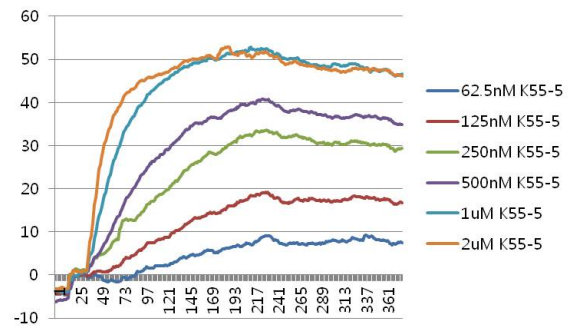

S2C

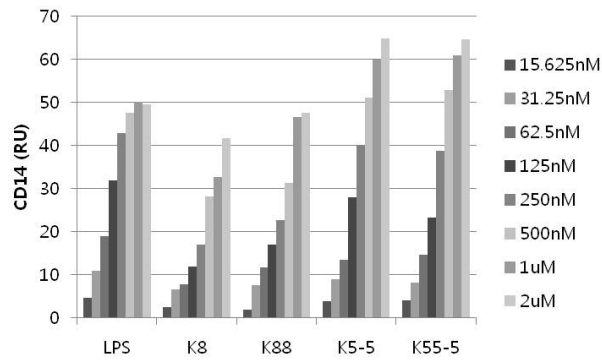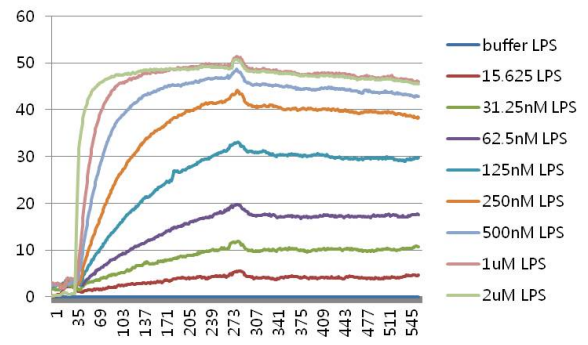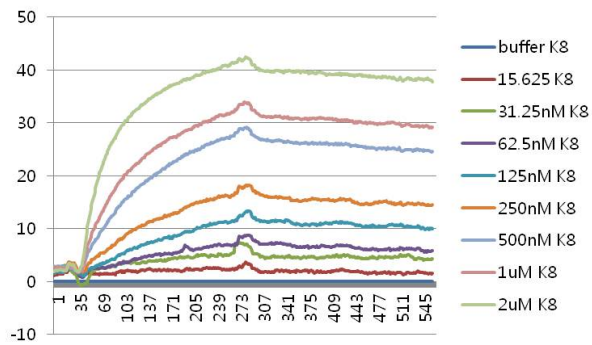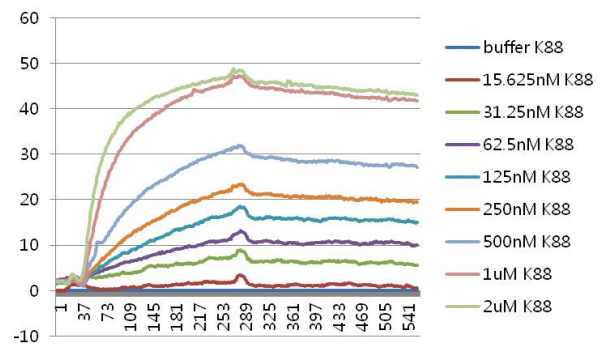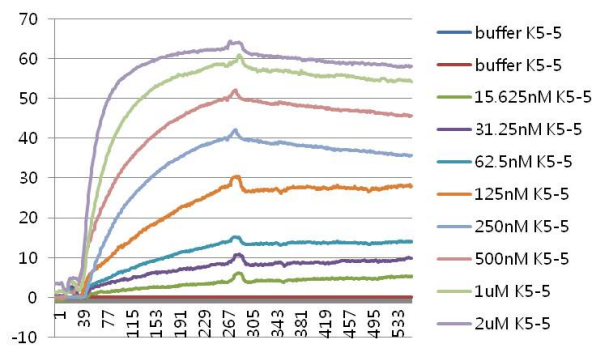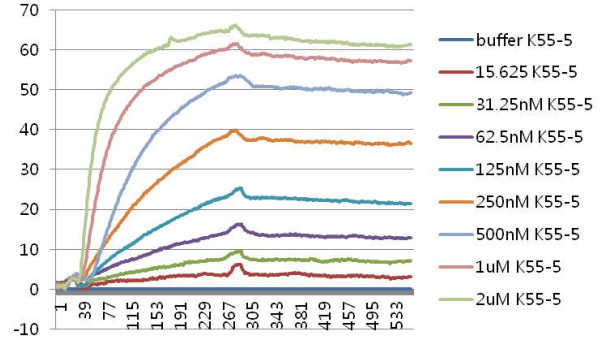

Supplement: s1 [file s1 › applsci-1524547-supplementary.pdf]
